# Supplementary material for: Disulfidptosis and pentose phosphate pathway-associated prognosis signature guides immunotherapy for lung adenocarcinoma patients
Source: Research Square preprint supplement (doi:10.21203/rs.3.rs-5051024/v1), 2024-10-22
Supplement: Supplementary file 1 [file 3bf0eec0ab822383a40d37ab.docx]

Supplementary Material

# Supplementary Figure and Table lengends

# Supplementary Figures


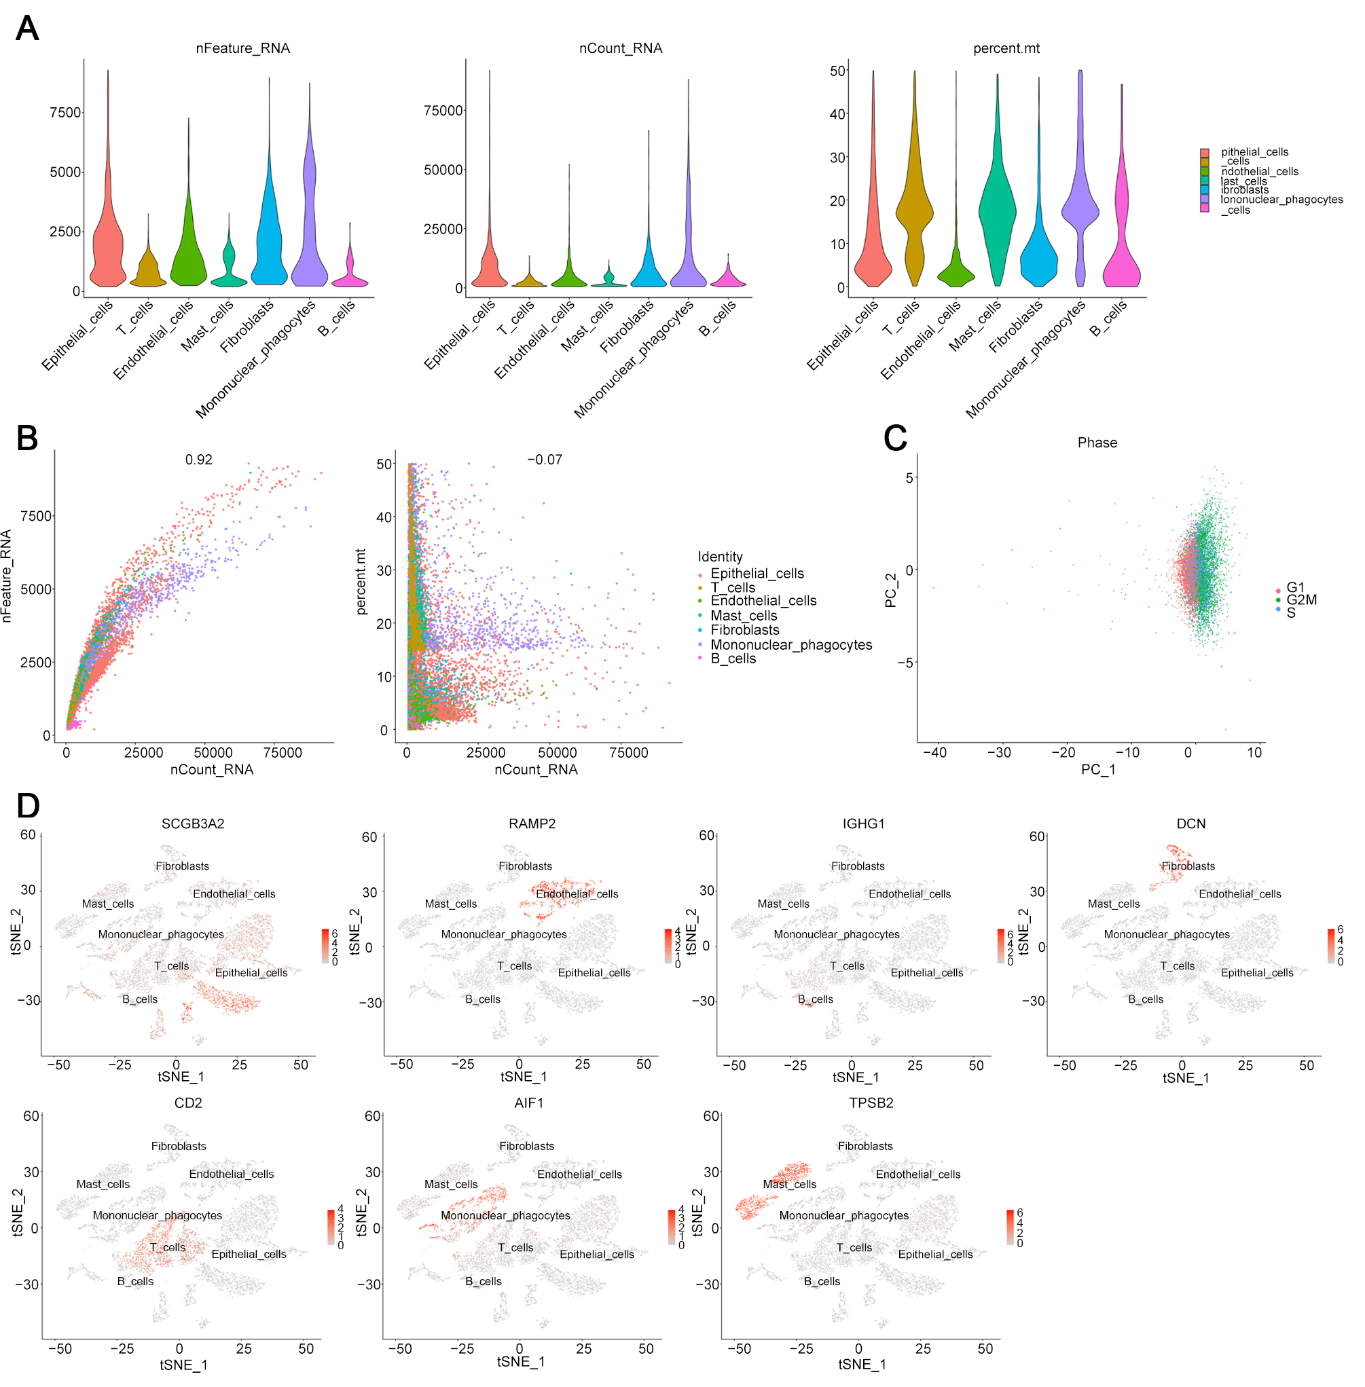


**Supplementary Figure 1.** Quality control and dimension reduction analysis of single-cell sequencing data. **(A)** Excluded cells that did not meet the criteria for quality control. **(B)** Correlation of sequencing depth and total intracellular sequence. **(C)** The principal component analysis for cell cycle. **(D)** Expression of marker genes that identify cell types.


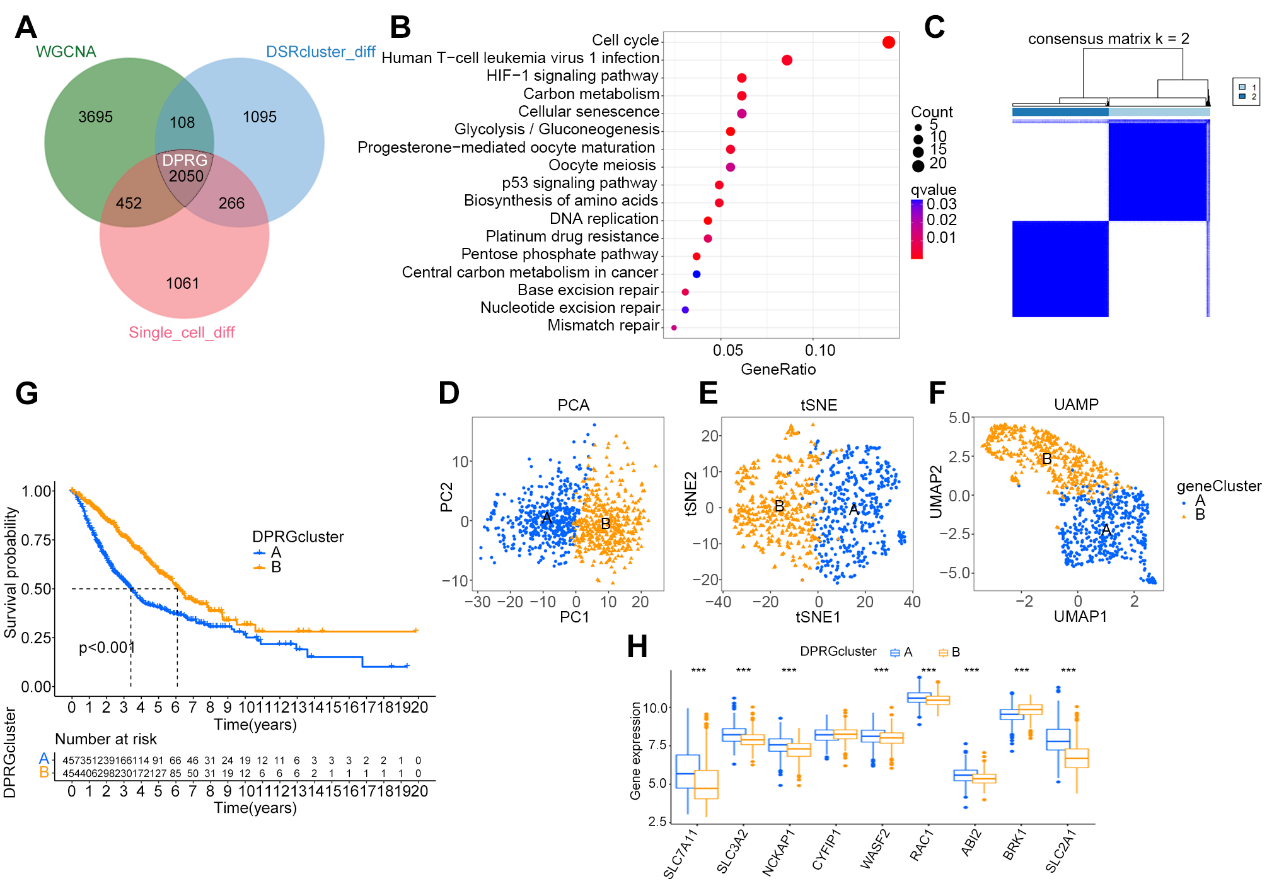


**Supplementary Figure 2.** Clustering based on overlapping genes between DEGs of DSR clusters, WGCNA gene modules as well as DEGs obtained from scRNA-Seq analysis. **(A)** Overlapping genes (DPRGs) between DEGs and DSR clusters, WGCNA gene modules, and DEGs obtained from scRNA-Seq analysis. **(B)** KEGG enrichment analysis of DPRGs. **(C)** Consensus clustering of OS-related DPRGs. **(D)** Kaplan–Meier curves for LUAD patients in two DPRG clusters. **(E–G)** PCA, t-SNE, and UMAP analysis for the twoclusters, respectively. **(H)** Differential expression levels of the nine DSRs in two DPRG clusters.


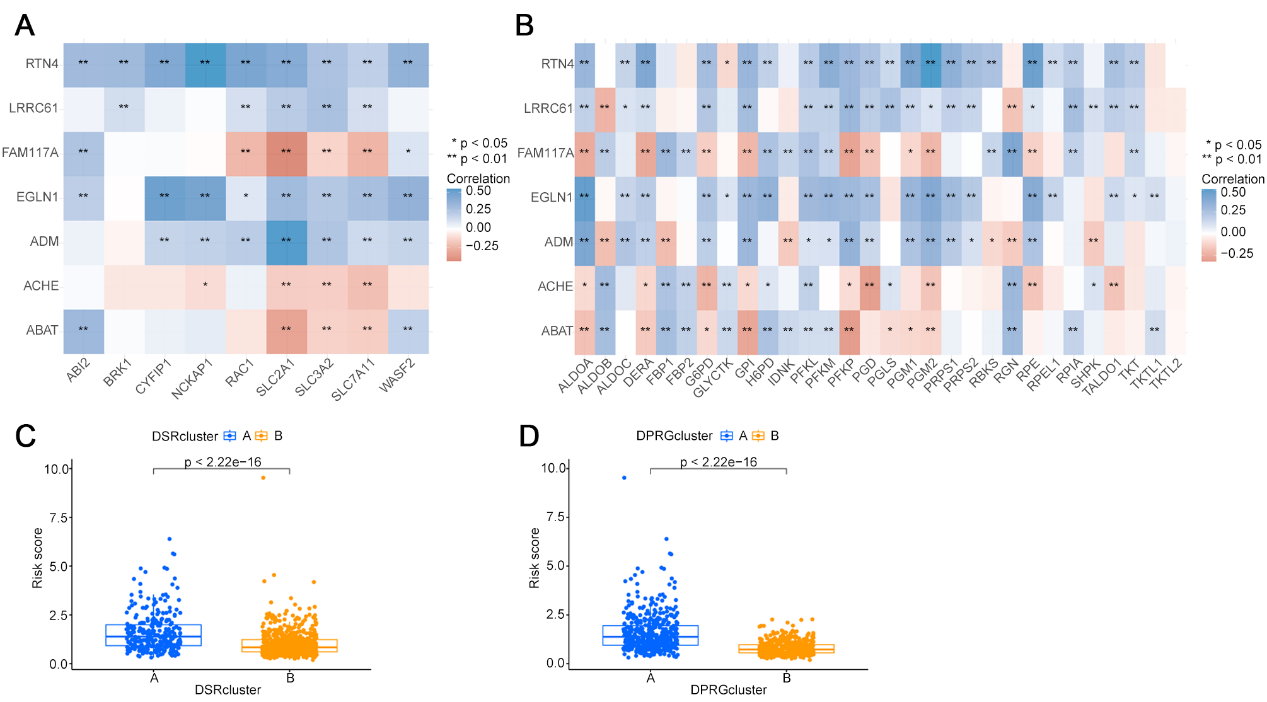


**Supplementary Figure 3.** Validation of the risk model. **(A)** Kaplan–Meier OS curves for LUAD patients in the low-risk and high-risk groups based on the risk signature in the indicated datasets. **(B)** ROC curves validate the prognostic capability of risk signature in the indicated datasets at 1, 3, and 5 years, respectively. **(C)** Differential gene expression in the risk signature between low-risk and high-risk groups in the indicated datasets. **(D)** Survival time and survival status of LUAD patients with various risk scores in the indicated datasets. **(E–F)** Correlation of the seven genes in risk signature with DSRs (E) and PPP related genes (F). **(G–H)** Risk score differences among DSR clusters (G) and DPRG clusters (H). **p* < 0.05, and ***p* < 0.01.


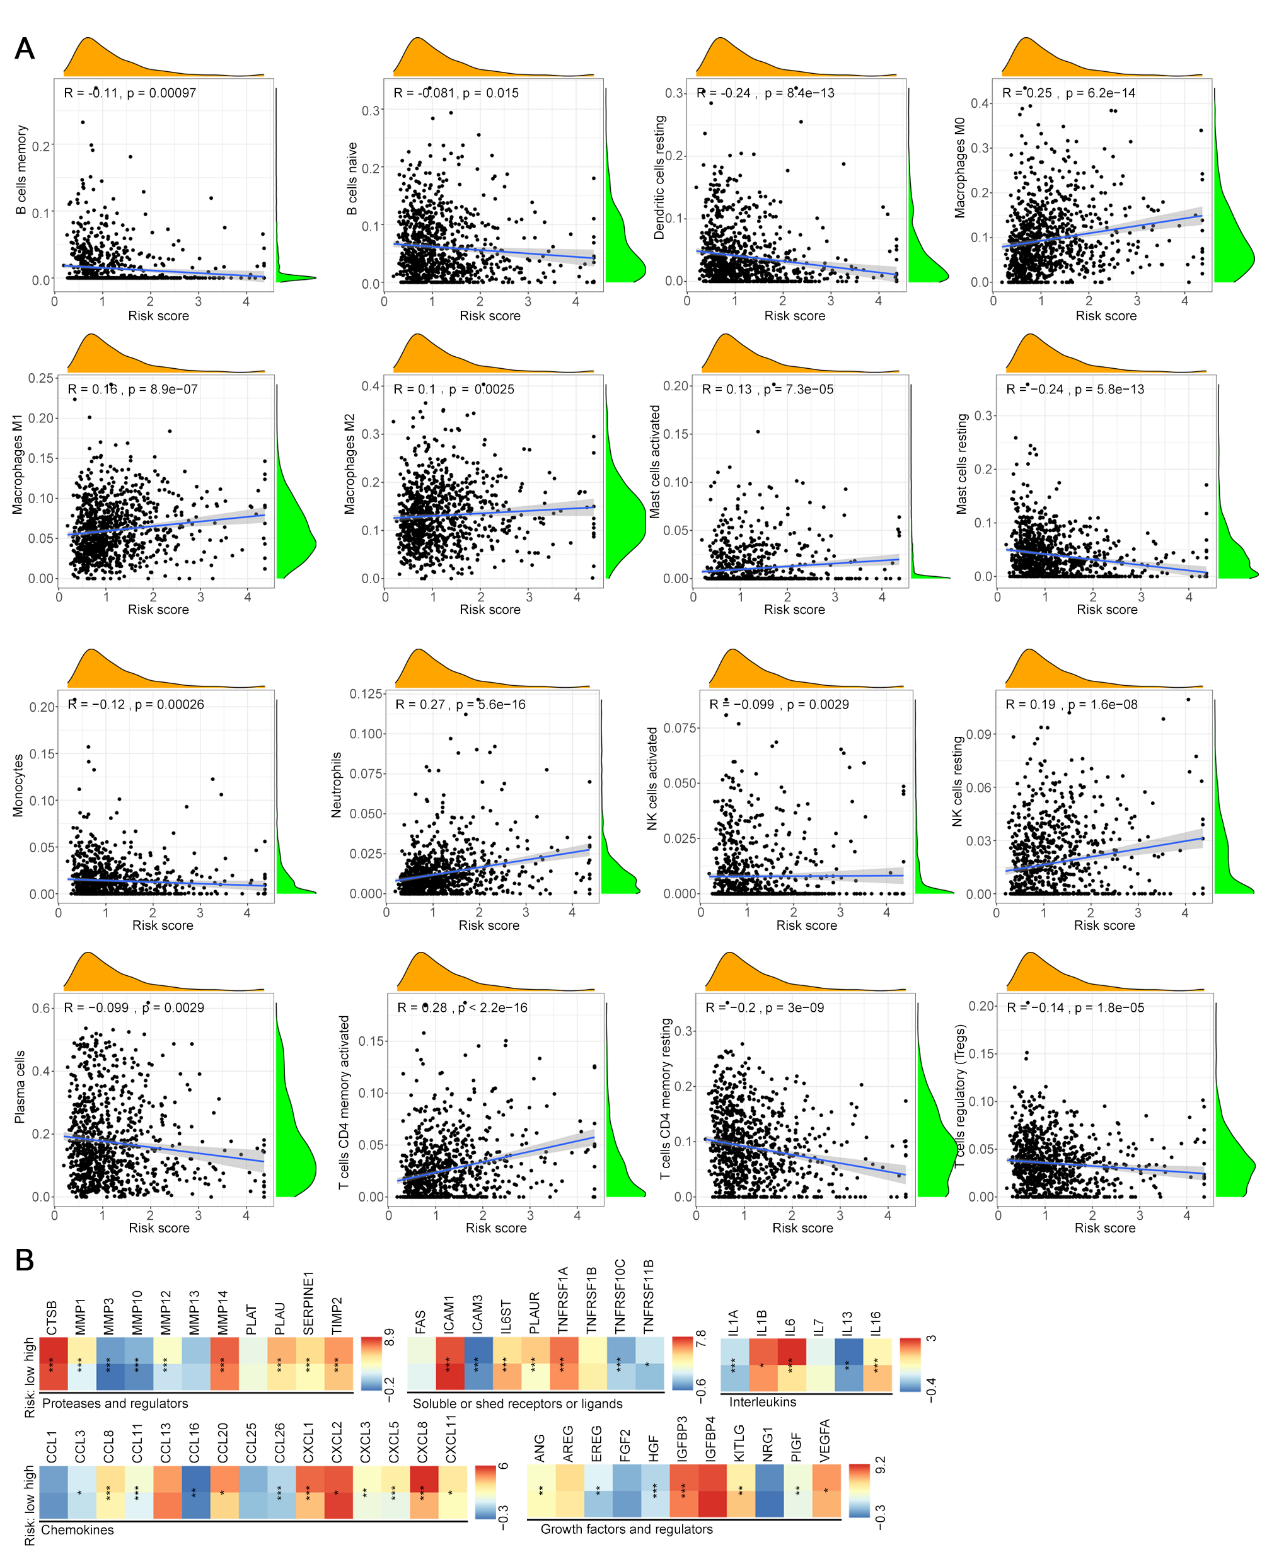


**Supplementary Figure 4.** Associations of the risk signature with TIME and cytokine expression. **(A)** Correlation of the risk signature with infiltrating immune cell populations. **(B)** Differences in mRNA expression of cytokines and their receptors in low-risk and high-risk groups. **p* < 0.05, ***p* < 0.01, and ****p* < 0.001.


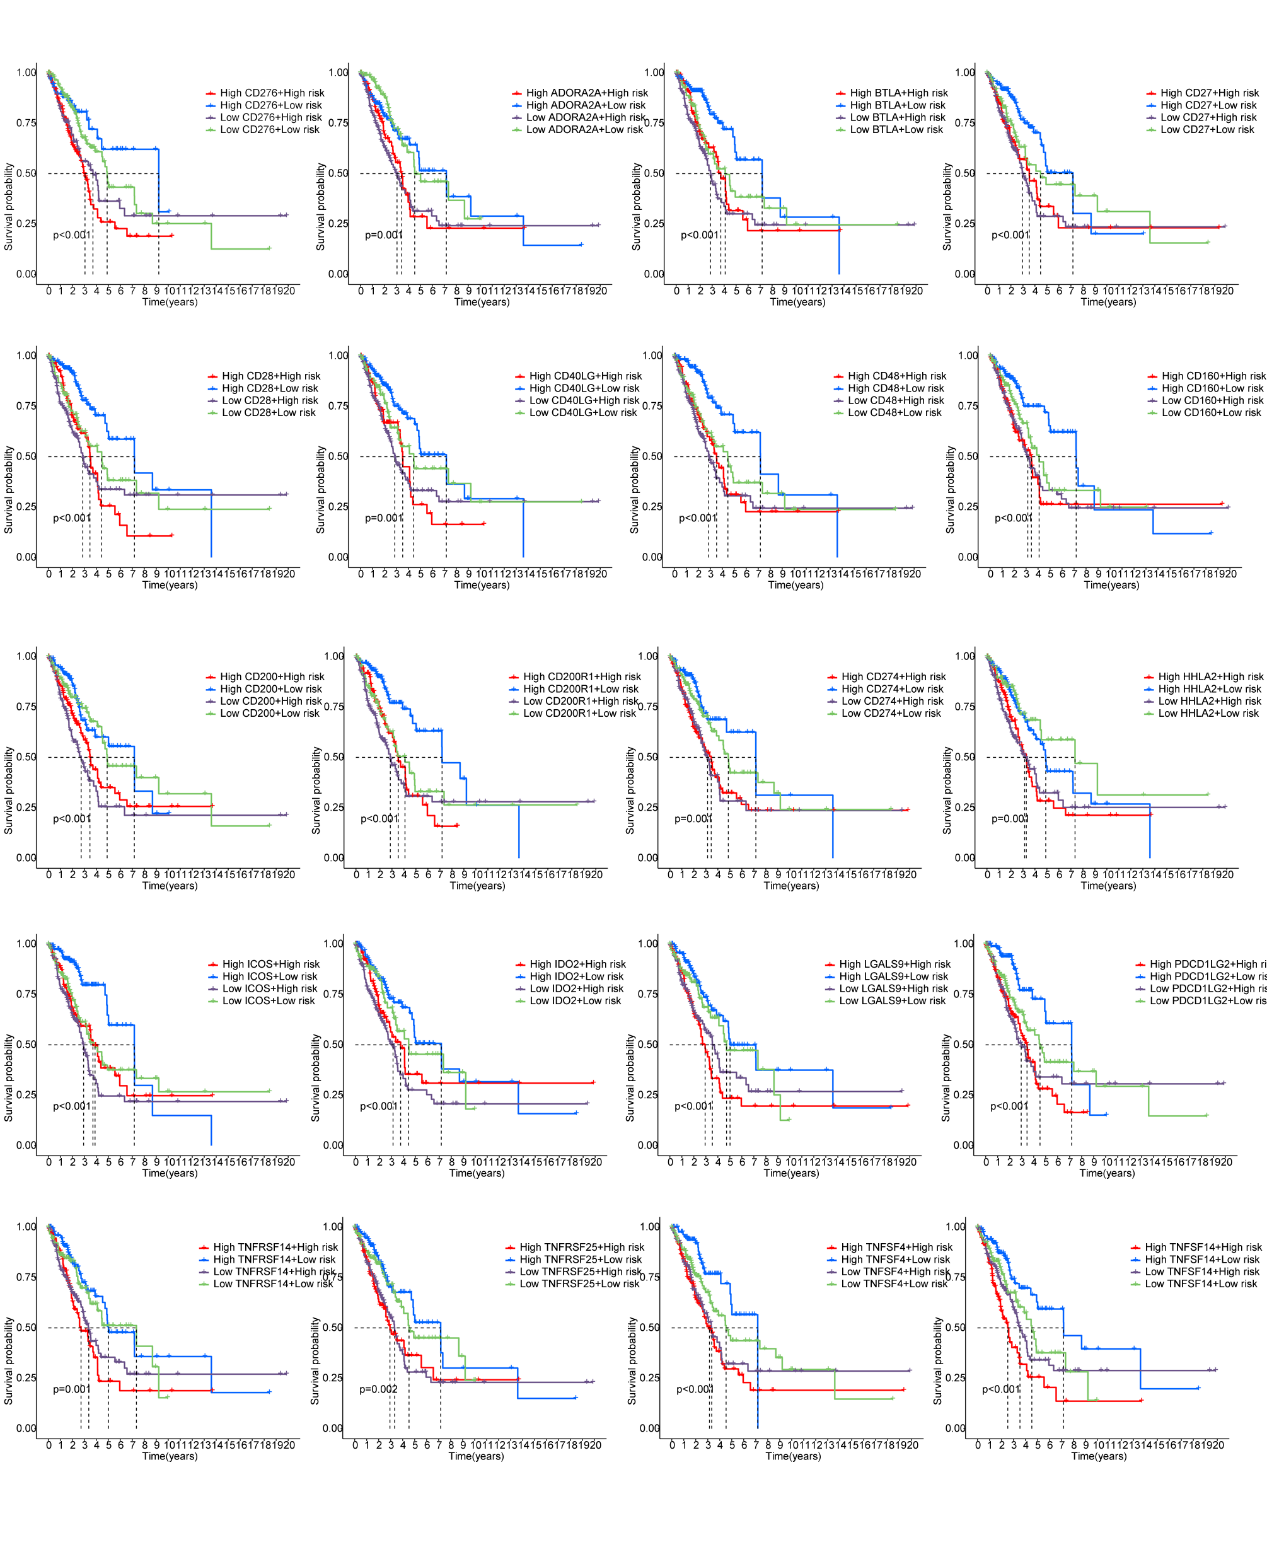


**Supplementary Figure 5.** Kaplan–Meier curves for LUAD patients based on risk score and immune checkpoint expression level.


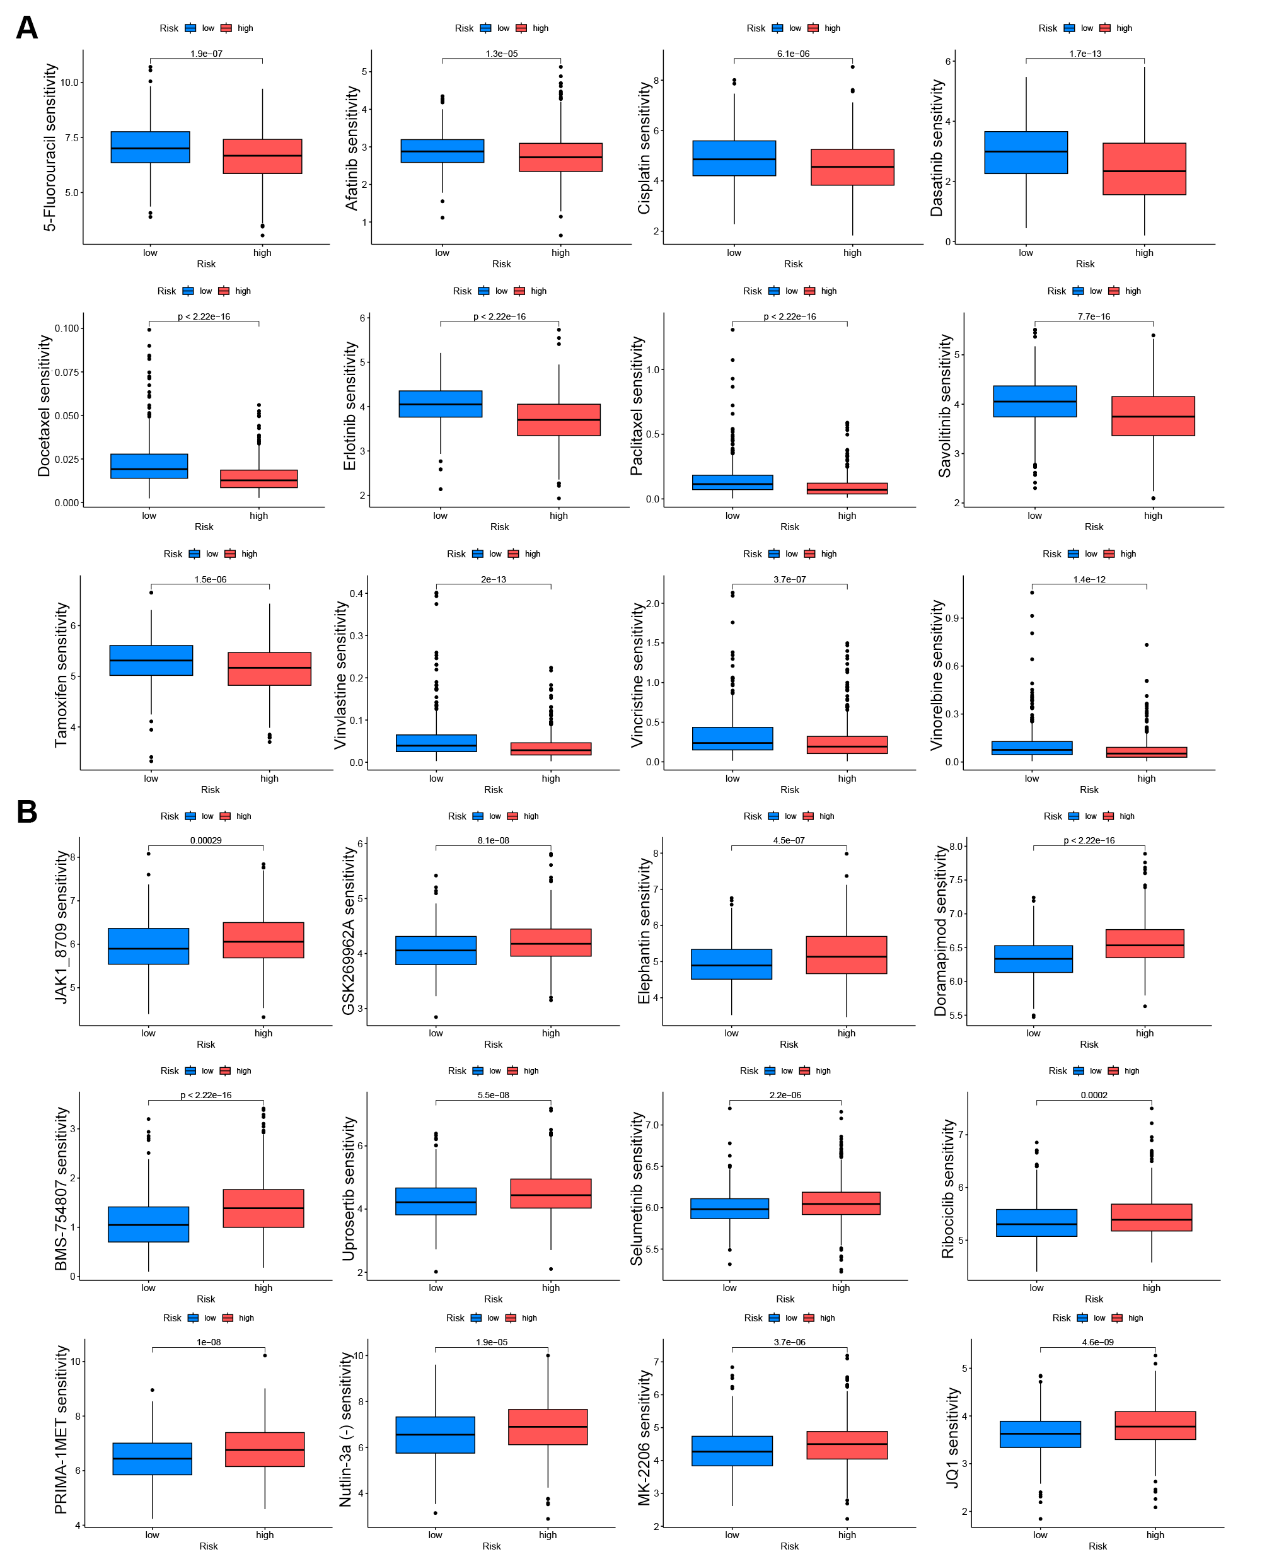


**Supplementary Figure 6.** Drug sensitivity of the risk signature. **(A)** Sensitivity to commonly used drugs in low-risk and high-risk groups. **(B)** Screening for drugs that are more effective to the high-risk group.


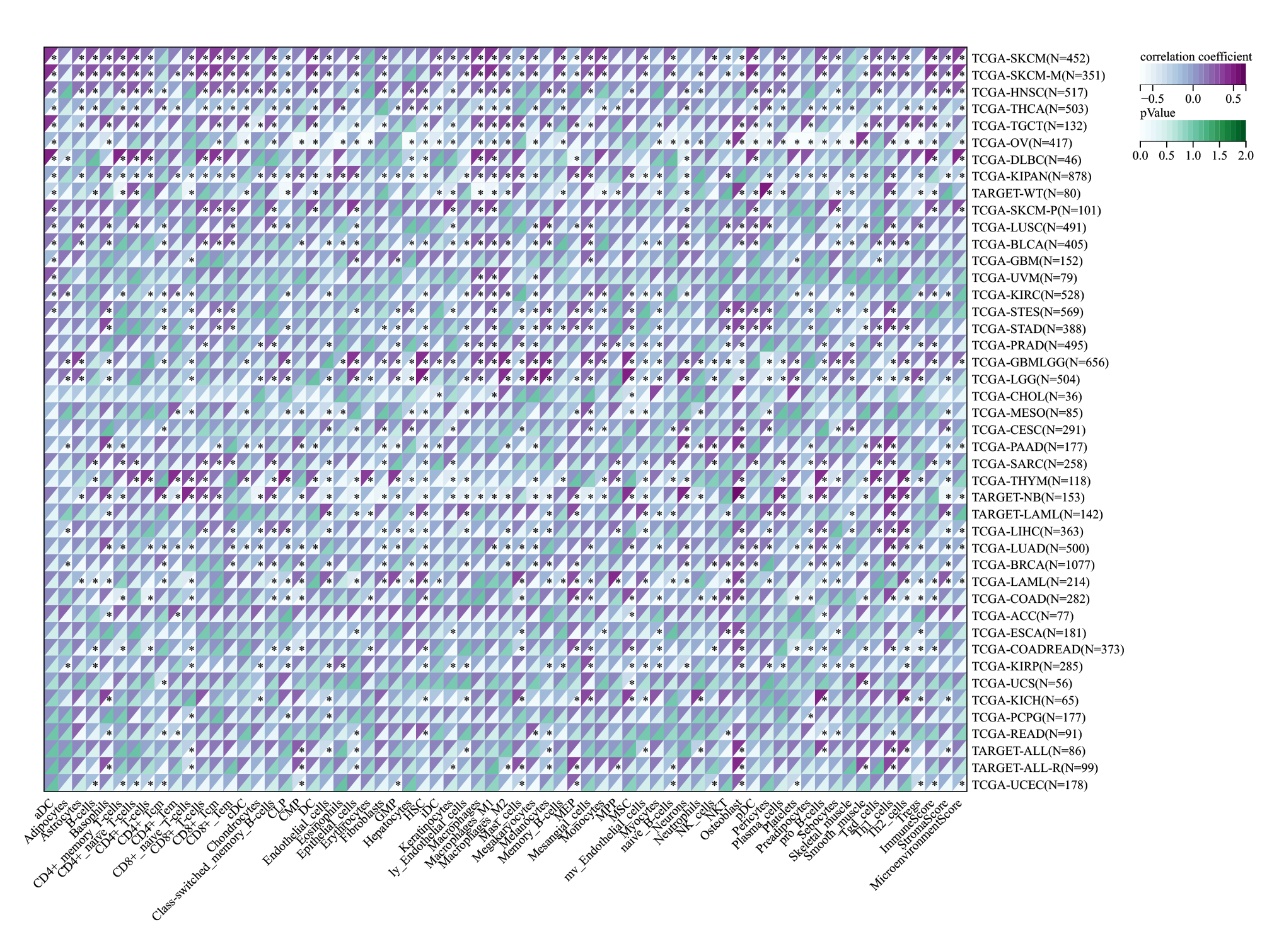


**Supplementary Figure 7.** Correlation of LRRC61 expression with immune cell populations in pan-cancer.


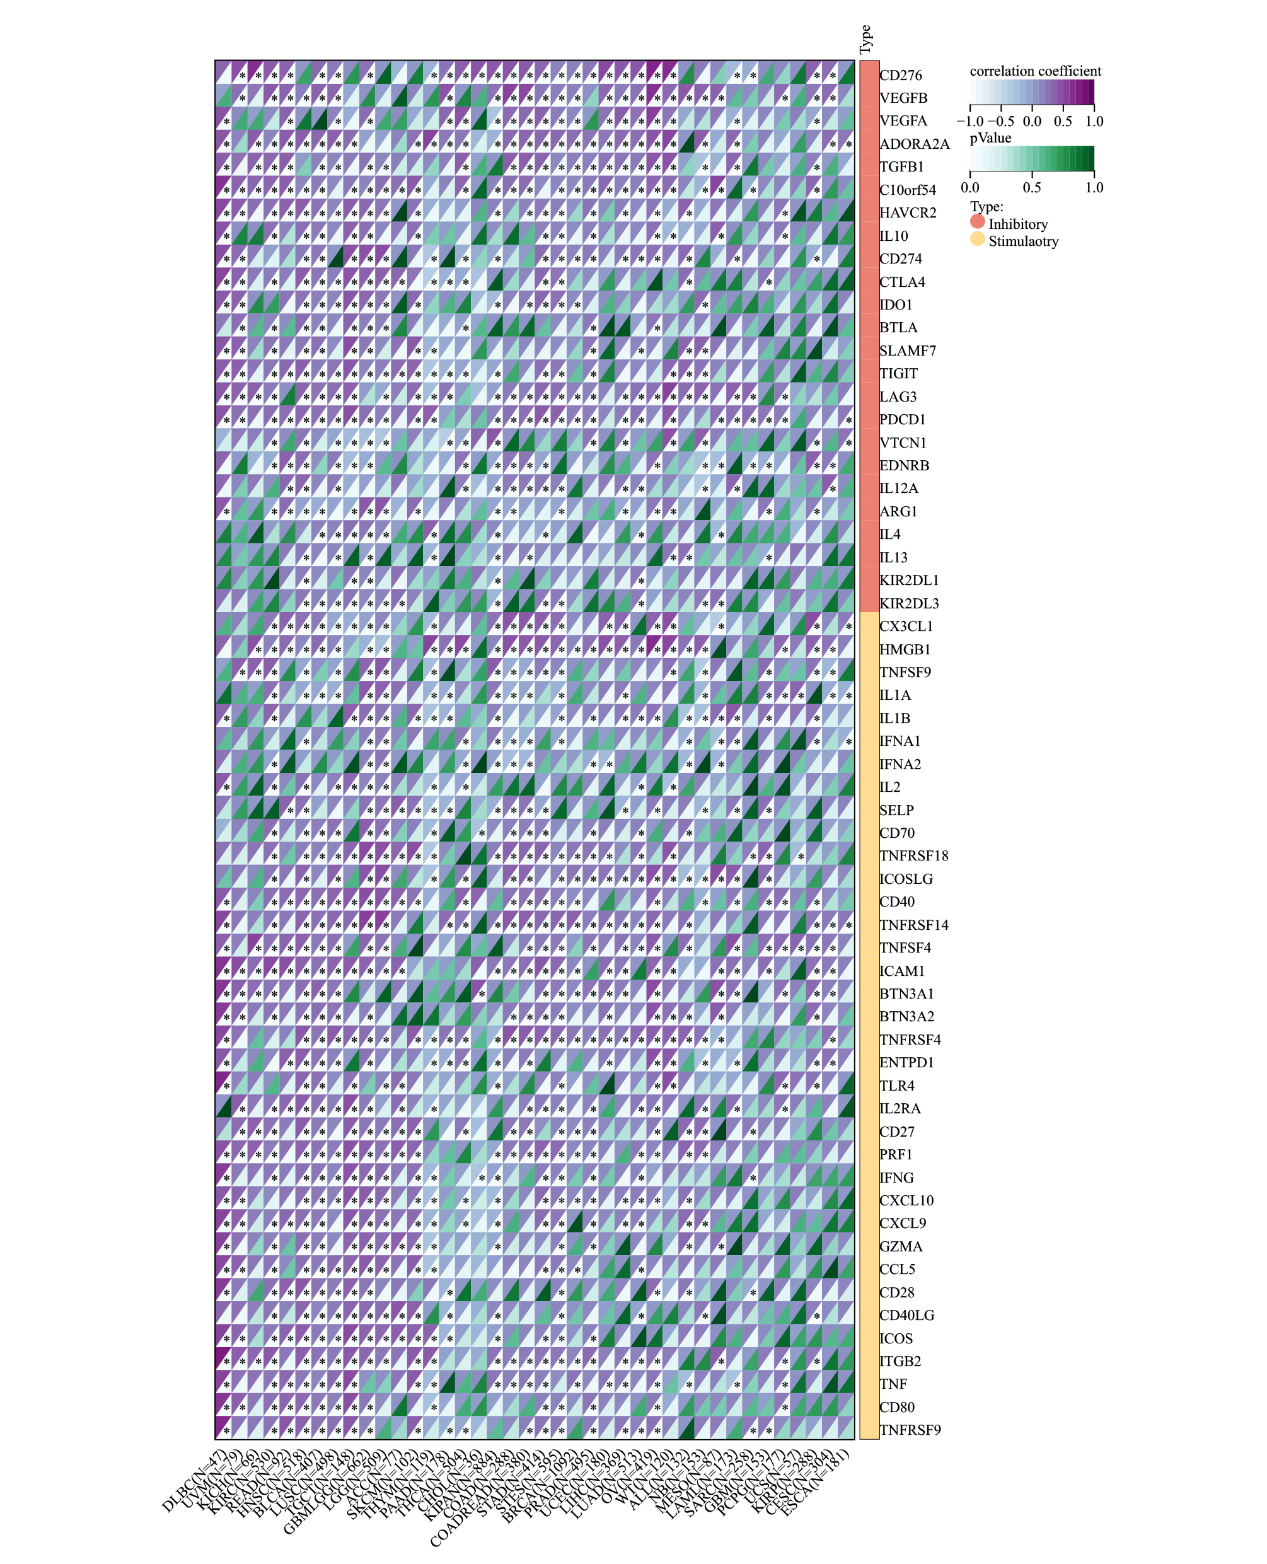


**Supplementary Figure 8.** Correlation of LRRC61 expression with immune checkpoint expression in pan-cancer.

**1.2 Supplementary Tables**

**Supplementary Table 1.** Oligonucleotides used in this study.

**Supplementary Table 2.** Different DSR clusters of patients with LUAD from the TCGA and GEO databases.

**Supplementary Table 3.** Genes related to pentose phosphate pathway.

**Supplementary Table 4.** Overall survival (OS)-related DPRGs.

**Supplementary Table 5.** The coefficients of the risk signature.
