# Supplementary material for: Disulfidptosis and pentose phosphate pathway-associated prognosis signature guides immunotherapy for lung adenocarcinoma patients
Source: Research Square preprint supplement (doi:10.21203/rs.3.rs-5051024/v1), 2024-10-22
Supplement: Supplementary file 2 [file 53d71ed73a98734559e4104e.xlsx]

## Sheet: Table S1
Table S1. Oligonucleotides used in this study.
Oligonucleotides	Nucleotide sequence (5'-3')
siRNA
si-NC	GCUUCGCGCCGUUGUCUUA
si-LRRC61-1	GTAGTGAGTTCTACCAGCTGT
si-LRRC61-2	TTGGGCGTGGTAGTGAGTTCT
Primer
GAPDH	GGAGCGAGATCCCTCCAAAAT(forward)
	GGCTGTTGTCATACTTCTCATGG(reverse)
LRRC61	AACCCGCTCTGTGCCAAC(forward)
	ACGCCCAATCACACGCTC(reverse)

## Sheet: Table S2
Table S2. Different DSR clusters of patients with LUAD from the TCGA and GEO databases.
ID	DSRcluster
TCGA_TCGA-35-5375	A
TCGA_TCGA-55-A4DF	A
TCGA_TCGA-MP-A4T4	B
TCGA_TCGA-62-A471	A
TCGA_TCGA-L9-A5IP	A
TCGA_TCGA-49-AARR	B
TCGA_TCGA-78-8662	B
TCGA_TCGA-05-4430	B
TCGA_TCGA-44-7659	B
TCGA_TCGA-L9-A50W	B
TCGA_TCGA-75-7025	B
TCGA_TCGA-05-4424	B
TCGA_TCGA-62-A46P	B
TCGA_TCGA-38-4627	B
TCGA_TCGA-86-8073	A
TCGA_TCGA-69-7765	B
TCGA_TCGA-44-5645	B
TCGA_TCGA-55-6984	A
TCGA_TCGA-69-7764	B
TCGA_TCGA-86-A4P7	B
TCGA_TCGA-55-8620	A
TCGA_TCGA-97-8177	B
TCGA_TCGA-50-6595	B
TCGA_TCGA-55-A492	A
TCGA_TCGA-78-7633	B
TCGA_TCGA-97-A4LX	B
TCGA_TCGA-78-7220	A
TCGA_TCGA-53-7624	A
TCGA_TCGA-49-AARN	B
TCGA_TCGA-62-A46R	B
TCGA_TCGA-78-7156	A
TCGA_TCGA-50-8457	B
TCGA_TCGA-91-8496	B
TCGA_TCGA-55-8092	B
TCGA_TCGA-75-5122	A
TCGA_TCGA-NJ-A4YQ	B
TCGA_TCGA-50-5072	A
TCGA_TCGA-91-6831	B
TCGA_TCGA-91-A4BD	B
TCGA_TCGA-69-8255	B
TCGA_TCGA-69-8253	A
TCGA_TCGA-86-A4D0	A
TCGA_TCGA-78-8640	A
TCGA_TCGA-97-8174	B
TCGA_TCGA-55-6987	B
TCGA_TCGA-49-6744	B
TCGA_TCGA-55-8096	B
TCGA_TCGA-J2-8192	B
TCGA_TCGA-44-7671	A
TCGA_TCGA-44-2662	A
TCGA_TCGA-49-AAR9	A
TCGA_TCGA-86-A4P8	B
TCGA_TCGA-78-7158	B
TCGA_TCGA-80-5611	A
TCGA_TCGA-44-4112	B
TCGA_TCGA-71-6725	B
TCGA_TCGA-44-2656	B
TCGA_TCGA-05-5715	A
TCGA_TCGA-64-5815	B
TCGA_TCGA-55-7816	B
TCGA_TCGA-95-7948	B
TCGA_TCGA-05-4432	B
TCGA_TCGA-99-8033	A
TCGA_TCGA-78-7143	A
TCGA_TCGA-73-4668	B
TCGA_TCGA-44-5644	A
TCGA_TCGA-38-4625	B
TCGA_TCGA-91-8499	B
TCGA_TCGA-86-6851	B
TCGA_TCGA-44-6779	A
TCGA_TCGA-78-7537	B
TCGA_TCGA-05-4434	A
TCGA_TCGA-67-3773	B
TCGA_TCGA-05-5425	B
TCGA_TCGA-97-A4M2	B
TCGA_TCGA-50-5941	B
TCGA_TCGA-78-7539	B
TCGA_TCGA-67-3771	A
TCGA_TCGA-55-8299	B
TCGA_TCGA-05-5429	B
TCGA_TCGA-93-A4JO	B
TCGA_TCGA-44-A47A	A
TCGA_TCGA-86-A4JF	B
TCGA_TCGA-05-4402	B
TCGA_TCGA-55-7914	B
TCGA_TCGA-49-4490	B
TCGA_TCGA-55-8090	A
TCGA_TCGA-MP-A4TC	B
TCGA_TCGA-64-1681	B
TCGA_TCGA-99-AA5R	B
TCGA_TCGA-49-4486	B
TCGA_TCGA-91-6847	B
TCGA_TCGA-05-4249	B
TCGA_TCGA-91-A4BC	B
TCGA_TCGA-55-7570	A
TCGA_TCGA-50-5049	B
TCGA_TCGA-86-8672	A
TCGA_TCGA-50-5066	A
TCGA_TCGA-55-7727	B
TCGA_TCGA-86-8674	A
TCGA_TCGA-50-5942	B
TCGA_TCGA-69-A59K	A
TCGA_TCGA-44-2666	A
TCGA_TCGA-50-6592	A
TCGA_TCGA-62-8395	A
TCGA_TCGA-05-4410	B
TCGA_TCGA-55-6975	A
TCGA_TCGA-73-4662	B
TCGA_TCGA-49-6767	B
TCGA_TCGA-44-A47G	B
TCGA_TCGA-NJ-A4YG	B
TCGA_TCGA-55-8507	B
TCGA_TCGA-05-4433	A
TCGA_TCGA-55-A4DG	B
TCGA_TCGA-49-4494	B
TCGA_TCGA-NJ-A7XG	B
TCGA_TCGA-44-6147	B
TCGA_TCGA-49-AARO	B
TCGA_TCGA-44-6774	B
TCGA_TCGA-49-AAR4	B
TCGA_TCGA-91-6848	A
TCGA_TCGA-50-8460	B
TCGA_TCGA-44-2668	B
TCGA_TCGA-55-8091	A
TCGA_TCGA-50-6673	B
TCGA_TCGA-49-AARE	A
TCGA_TCGA-55-6985	B
TCGA_TCGA-55-6642	B
TCGA_TCGA-50-6591	B
TCGA_TCGA-78-7166	A
TCGA_TCGA-05-4427	B
TCGA_TCGA-49-4487	B
TCGA_TCGA-73-4676	A
TCGA_TCGA-49-4507	A
TCGA_TCGA-78-7148	A
TCGA_TCGA-55-8514	B
TCGA_TCGA-55-7576	B
TCGA_TCGA-55-6969	B
TCGA_TCGA-93-7347	B
TCGA_TCGA-69-7978	A
TCGA_TCGA-NJ-A4YF	B
TCGA_TCGA-91-6830	A
TCGA_TCGA-44-7672	B
TCGA_TCGA-78-7540	A
TCGA_TCGA-55-7227	B
TCGA_TCGA-MP-A4T6	B
TCGA_TCGA-99-8028	B
TCGA_TCGA-64-1677	B
TCGA_TCGA-05-4403	A
TCGA_TCGA-55-6980	B
TCGA_TCGA-55-8511	A
TCGA_TCGA-78-7167	A
TCGA_TCGA-55-8615	B
TCGA_TCGA-55-A494	B
TCGA_TCGA-78-7147	B
TCGA_TCGA-97-A4M0	B
TCGA_TCGA-55-7573	B
TCGA_TCGA-86-7714	B
TCGA_TCGA-64-1679	B
TCGA_TCGA-64-1680	B
TCGA_TCGA-86-8669	B
TCGA_TCGA-78-7145	B
TCGA_TCGA-86-8075	A
TCGA_TCGA-99-8025	B
TCGA_TCGA-L9-A743	B
TCGA_TCGA-55-8094	B
TCGA_TCGA-86-A456	B
TCGA_TCGA-MP-A4SW	B
TCGA_TCGA-44-3919	B
TCGA_TCGA-80-5608	B
TCGA_TCGA-75-6207	B
TCGA_TCGA-69-7973	A
TCGA_TCGA-86-8671	B
TCGA_TCGA-67-3772	B
TCGA_TCGA-35-4122	B
TCGA_TCGA-35-4123	B
TCGA_TCGA-49-6761	B
TCGA_TCGA-55-6982	B
TCGA_TCGA-44-A4SU	B
TCGA_TCGA-86-8279	B
TCGA_TCGA-05-4396	A
TCGA_TCGA-86-8358	A
TCGA_TCGA-55-7815	A
TCGA_TCGA-78-7162	A
TCGA_TCGA-MN-A4N1	A
TCGA_TCGA-44-6777	B
TCGA_TCGA-55-8301	B
TCGA_TCGA-05-4422	B
TCGA_TCGA-49-4506	A
TCGA_TCGA-05-4417	B
TCGA_TCGA-75-5146	B
TCGA_TCGA-62-A46O	A
TCGA_TCGA-97-8552	B
TCGA_TCGA-75-6203	B
TCGA_TCGA-MP-A5C7	A
TCGA_TCGA-86-8074	B
TCGA_TCGA-97-7937	B
TCGA_TCGA-97-8175	B
TCGA_TCGA-97-A4M7	B
TCGA_TCGA-05-4420	B
TCGA_TCGA-91-8497	B
TCGA_TCGA-38-4632	B
TCGA_TCGA-75-6211	A
TCGA_TCGA-78-7163	A
TCGA_TCGA-86-7701	A
TCGA_TCGA-67-3770	B
TCGA_TCGA-38-4629	B
TCGA_TCGA-55-6972	B
TCGA_TCGA-MP-A4TA	A
TCGA_TCGA-50-5931	A
TCGA_TCGA-55-7994	B
TCGA_TCGA-55-7724	B
TCGA_TCGA-55-7725	B
TCGA_TCGA-MP-A4SY	A
TCGA_TCGA-78-7154	A
TCGA_TCGA-73-4659	A
TCGA_TCGA-50-5068	B
TCGA_TCGA-69-7980	B
TCGA_TCGA-73-7498	B
TCGA_TCGA-86-8585	B
TCGA_TCGA-78-7542	A
TCGA_TCGA-05-4250	B
TCGA_TCGA-44-6776	A
TCGA_TCGA-38-4630	B
TCGA_TCGA-05-4418	A
TCGA_TCGA-55-8085	A
TCGA_TCGA-55-7995	A
TCGA_TCGA-55-7284	A
TCGA_TCGA-55-6979	B
TCGA_TCGA-62-A472	B
TCGA_TCGA-55-8204	A
TCGA_TCGA-62-8398	A
TCGA_TCGA-MP-A4TI	B
TCGA_TCGA-67-4679	B
TCGA_TCGA-05-4390	A
TCGA_TCGA-44-8120	B
TCGA_TCGA-O1-A52J	B
TCGA_TCGA-67-6217	B
TCGA_TCGA-55-5899	A
TCGA_TCGA-MP-A4TK	B
TCGA_TCGA-MN-A4N4	B
TCGA_TCGA-73-4666	A
TCGA_TCGA-L4-A4E6	B
TCGA_TCGA-78-7536	B
TCGA_TCGA-05-4389	A
TCGA_TCGA-55-7281	B
TCGA_TCGA-97-7547	A
TCGA_TCGA-62-8394	B
TCGA_TCGA-86-8668	B
TCGA_TCGA-50-5939	A
TCGA_TCGA-38-7271	B
TCGA_TCGA-49-AARQ	B
TCGA_TCGA-64-1678	A
TCGA_TCGA-49-AAR3	A
TCGA_TCGA-05-4395	A
TCGA_TCGA-44-A479	B
TCGA_TCGA-49-4514	B
TCGA_TCGA-62-A46S	B
TCGA_TCGA-55-A490	B
TCGA_TCGA-97-7938	B
TCGA_TCGA-55-8097	B
TCGA_TCGA-55-8208	A
TCGA_TCGA-69-7974	B
TCGA_TCGA-55-6968	B
TCGA_TCGA-44-3917	A
TCGA_TCGA-05-4415	A
TCGA_TCGA-44-6145	A
TCGA_TCGA-75-7030	B
TCGA_TCGA-44-7667	B
TCGA_TCGA-97-7553	B
TCGA_TCGA-78-7150	A
TCGA_TCGA-69-7763	B
TCGA_TCGA-95-7947	B
TCGA_TCGA-55-8089	A
TCGA_TCGA-86-7711	A
TCGA_TCGA-55-8621	B
TCGA_TCGA-49-4501	B
TCGA_TCGA-L9-A8F4	B
TCGA_TCGA-86-7953	A
TCGA_TCGA-38-4628	B
TCGA_TCGA-55-A48Y	A
TCGA_TCGA-MP-A4T9	B
TCGA_TCGA-91-6835	B
TCGA_TCGA-50-6590	B
TCGA_TCGA-95-7039	B
TCGA_TCGA-55-8206	B
TCGA_TCGA-44-7661	B
TCGA_TCGA-J2-A4AD	A
TCGA_TCGA-75-6206	B
TCGA_TCGA-55-8616	B
TCGA_TCGA-50-5051	A
TCGA_TCGA-97-A4M3	A
TCGA_TCGA-97-7552	B
TCGA_TCGA-44-2657	B
TCGA_TCGA-91-6840	B
TCGA_TCGA-55-7907	B
TCGA_TCGA-49-4510	B
TCGA_TCGA-MP-A4SV	B
TCGA_TCGA-55-7726	B
TCGA_TCGA-35-3615	A
TCGA_TCGA-97-A4M6	B
TCGA_TCGA-86-7955	A
TCGA_TCGA-L9-A443	B
TCGA_TCGA-53-7813	B
TCGA_TCGA-55-A491	B
TCGA_TCGA-86-8056	B
TCGA_TCGA-78-8655	B
TCGA_TCGA-L9-A444	B
TCGA_TCGA-86-8055	B
TCGA_TCGA-55-6970	A
TCGA_TCGA-49-6745	B
TCGA_TCGA-05-4405	B
TCGA_TCGA-MP-A4TH	B
TCGA_TCGA-99-7458	B
TCGA_TCGA-55-1594	B
TCGA_TCGA-44-7669	A
TCGA_TCGA-55-7913	A
TCGA_TCGA-86-6562	B
TCGA_TCGA-95-7944	B
TCGA_TCGA-05-4398	B
TCGA_TCGA-78-7161	B
TCGA_TCGA-50-5933	A
TCGA_TCGA-55-8087	B
TCGA_TCGA-91-7771	B
TCGA_TCGA-67-6216	B
TCGA_TCGA-73-4675	A
TCGA_TCGA-64-1676	B
TCGA_TCGA-55-6981	B
TCGA_TCGA-75-5147	B
TCGA_TCGA-L9-A7SV	B
TCGA_TCGA-78-7160	A
TCGA_TCGA-55-1595	B
TCGA_TCGA-62-8402	A
TCGA_TCGA-78-8648	B
TCGA_TCGA-44-3918	B
TCGA_TCGA-80-5607	A
TCGA_TCGA-55-A57B	A
TCGA_TCGA-38-6178	B
TCGA_TCGA-78-7535	B
TCGA_TCGA-55-6986	A
TCGA_TCGA-91-6849	A
TCGA_TCGA-55-7903	B
TCGA_TCGA-55-A493	B
TCGA_TCGA-86-8280	B
TCGA_TCGA-91-6828	B
TCGA_TCGA-55-A48X	B
TCGA_TCGA-50-5932	B
TCGA_TCGA-05-5423	B
TCGA_TCGA-05-5420	B
TCGA_TCGA-62-A46Y	B
TCGA_TCGA-05-4384	A
TCGA_TCGA-97-A4M1	B
TCGA_TCGA-95-7567	B
TCGA_TCGA-55-7910	A
TCGA_TCGA-55-8302	A
TCGA_TCGA-MN-A4N5	B
TCGA_TCGA-95-A4VK	B
TCGA_TCGA-95-8494	A
TCGA_TCGA-75-7027	A
TCGA_TCGA-49-4505	B
TCGA_TCGA-44-6775	A
TCGA_TCGA-55-1592	B
TCGA_TCGA-05-4397	B
TCGA_TCGA-44-2665	A
TCGA_TCGA-55-A48Z	B
TCGA_TCGA-86-8359	B
TCGA_TCGA-75-6212	B
TCGA_TCGA-75-7031	B
TCGA_TCGA-44-3396	B
TCGA_TCGA-86-8281	A
TCGA_TCGA-62-8397	B
TCGA_TCGA-J2-A4AG	B
TCGA_TCGA-78-7152	A
TCGA_TCGA-93-7348	B
TCGA_TCGA-64-5775	B
TCGA_TCGA-78-7153	B
TCGA_TCGA-78-7149	A
TCGA_TCGA-MP-A4T8	B
TCGA_TCGA-44-2661	B
TCGA_TCGA-73-4658	B
TCGA_TCGA-44-6778	B
TCGA_TCGA-44-7670	A
TCGA_TCGA-55-8205	B
TCGA_TCGA-55-8512	A
TCGA_TCGA-55-8203	B
TCGA_TCGA-78-8660	A
TCGA_TCGA-44-A47B	B
TCGA_TCGA-50-5946	B
TCGA_TCGA-38-4631	A
TCGA_TCGA-64-5778	B
TCGA_TCGA-86-7954	B
TCGA_TCGA-55-6543	A
TCGA_TCGA-73-7499	B
TCGA_TCGA-62-8399	B
TCGA_TCGA-49-AAR0	A
TCGA_TCGA-55-7283	B
TCGA_TCGA-75-6205	A
TCGA_TCGA-50-6593	B
TCGA_TCGA-67-3774	B
TCGA_TCGA-49-AAQV	B
TCGA_TCGA-38-4626	B
TCGA_TCGA-95-7562	B
TCGA_TCGA-69-7760	B
TCGA_TCGA-71-8520	B
TCGA_TCGA-55-8614	B
TCGA_TCGA-55-7574	B
TCGA_TCGA-50-5935	B
TCGA_TCGA-95-7043	A
TCGA_TCGA-44-7660	A
TCGA_TCGA-MP-A4T7	A
TCGA_TCGA-55-6971	B
TCGA_TCGA-78-7155	B
TCGA_TCGA-MP-A4TE	A
TCGA_TCGA-95-A4VN	B
TCGA_TCGA-93-8067	A
TCGA_TCGA-J2-8194	A
TCGA_TCGA-55-8510	B
TCGA_TCGA-44-5643	B
TCGA_TCGA-86-7713	B
TCGA_TCGA-NJ-A55R	A
TCGA_TCGA-50-5044	B
TCGA_TCGA-64-5774	A
TCGA_TCGA-55-6712	B
TCGA_TCGA-44-2659	B
TCGA_TCGA-4B-A93V	A
TCGA_TCGA-86-8076	B
TCGA_TCGA-83-5908	A
TCGA_TCGA-44-A4SS	A
TCGA_TCGA-L4-A4E5	B
TCGA_TCGA-97-8171	B
TCGA_TCGA-93-A4JP	B
TCGA_TCGA-S2-AA1A	B
TCGA_TCGA-55-6978	B
TCGA_TCGA-78-7146	A
TCGA_TCGA-MP-A4TD	A
TCGA_TCGA-50-5930	B
TCGA_TCGA-64-5781	A
TCGA_TCGA-78-7159	A
TCGA_TCGA-69-8254	A
TCGA_TCGA-75-5126	B
TCGA_TCGA-50-7109	B
TCGA_TCGA-05-5428	B
TCGA_TCGA-49-4512	B
TCGA_TCGA-NJ-A4YP	B
TCGA_TCGA-50-5045	B
TCGA_TCGA-44-8119	A
TCGA_TCGA-44-8117	B
TCGA_TCGA-05-4425	B
TCGA_TCGA-55-1596	B
TCGA_TCGA-91-6836	A
TCGA_TCGA-49-4488	A
TCGA_TCGA-99-8032	B
TCGA_TCGA-49-6743	A
TCGA_TCGA-44-7662	B
TCGA_TCGA-44-2655	A
TCGA_TCGA-86-8673	B
TCGA_TCGA-MP-A4TF	A
TCGA_TCGA-67-6215	B
TCGA_TCGA-55-7911	B
TCGA_TCGA-75-6214	B
TCGA_TCGA-05-4244	B
TCGA_TCGA-73-4677	A
TCGA_TCGA-97-7554	B
TCGA_TCGA-05-4426	B
TCGA_TCGA-05-4382	B
TCGA_TCGA-J2-A4AE	A
TCGA_TCGA-73-4670	A
TCGA_TCGA-55-8506	B
TCGA_TCGA-50-6597	B
TCGA_TCGA-44-3398	B
TCGA_TCGA-50-6594	B
TCGA_TCGA-73-A9RS	A
TCGA_TCGA-53-7626	B
TCGA_TCGA-55-8505	A
TCGA_TCGA-97-A4M5	A
TCGA_TCGA-75-5125	B
TCGA_TCGA-62-A46U	A
TCGA_TCGA-62-A46V	B
TCGA_TCGA-50-5055	B
TCGA_TCGA-91-6829	B
GSE68465_GSM1672281	A
GSE68465_GSM1672282	B
GSE68465_GSM1672283	B
GSE68465_GSM1672284	B
GSE68465_GSM1672285	B
GSE68465_GSM1672286	A
GSE68465_GSM1672287	B
GSE68465_GSM1672288	B
GSE68465_GSM1672289	B
GSE68465_GSM1672290	B
GSE68465_GSM1672291	B
GSE68465_GSM1672292	B
GSE68465_GSM1672293	A
GSE68465_GSM1672294	B
GSE68465_GSM1672295	B
GSE68465_GSM1672296	B
GSE68465_GSM1672297	A
GSE68465_GSM1672298	B
GSE68465_GSM1672299	B
GSE68465_GSM1672300	B
GSE68465_GSM1672301	B
GSE68465_GSM1672302	A
GSE68465_GSM1672303	A
GSE68465_GSM1672304	B
GSE68465_GSM1672305	B
GSE68465_GSM1672306	B
GSE68465_GSM1672307	A
GSE68465_GSM1672308	B
GSE68465_GSM1672309	A
GSE68465_GSM1672310	A
GSE68465_GSM1672311	B
GSE68465_GSM1672312	B
GSE68465_GSM1672313	B
GSE68465_GSM1672314	B
GSE68465_GSM1672315	A
GSE68465_GSM1672316	B
GSE68465_GSM1672317	B
GSE68465_GSM1672318	A
GSE68465_GSM1672319	B
GSE68465_GSM1672320	A
GSE68465_GSM1672321	B
GSE68465_GSM1672322	B
GSE68465_GSM1672323	B
GSE68465_GSM1672324	A
GSE68465_GSM1672325	B
GSE68465_GSM1672326	B
GSE68465_GSM1672327	B
GSE68465_GSM1672328	B
GSE68465_GSM1672329	B
GSE68465_GSM1672330	B
GSE68465_GSM1672331	B
GSE68465_GSM1672332	B
GSE68465_GSM1672333	B
GSE68465_GSM1672334	A
GSE68465_GSM1672335	B
GSE68465_GSM1672336	B
GSE68465_GSM1672337	A
GSE68465_GSM1672338	A
GSE68465_GSM1672339	B
GSE68465_GSM1672340	B
GSE68465_GSM1672341	B
GSE68465_GSM1672342	B
GSE68465_GSM1672343	A
GSE68465_GSM1672344	B
GSE68465_GSM1672345	B
GSE68465_GSM1672346	A
GSE68465_GSM1672347	B
GSE68465_GSM1672348	B
GSE68465_GSM1672349	A
GSE68465_GSM1672350	A
GSE68465_GSM1672351	B
GSE68465_GSM1672352	A
GSE68465_GSM1672353	B
GSE68465_GSM1672354	B
GSE68465_GSM1672355	B
GSE68465_GSM1672356	B
GSE68465_GSM1672357	B
GSE68465_GSM1672358	B
GSE68465_GSM1672359	B
GSE68465_GSM1672360	B
GSE68465_GSM1672361	B
GSE68465_GSM1672362	A
GSE68465_GSM1672363	A
GSE68465_GSM1672364	B
GSE68465_GSM1672365	B
GSE68465_GSM1672366	A
GSE68465_GSM1672367	B
GSE68465_GSM1672368	A
GSE68465_GSM1672369	A
GSE68465_GSM1672370	A
GSE68465_GSM1672371	B
GSE68465_GSM1672372	B
GSE68465_GSM1672373	B
GSE68465_GSM1672374	A
GSE68465_GSM1672375	A
GSE68465_GSM1672376	A
GSE68465_GSM1672377	A
GSE68465_GSM1672378	B
GSE68465_GSM1672379	B
GSE68465_GSM1672380	A
GSE68465_GSM1672381	B
GSE68465_GSM1672382	B
GSE68465_GSM1672383	B
GSE68465_GSM1672384	B
GSE68465_GSM1672385	B
GSE68465_GSM1672386	A
GSE68465_GSM1672387	B
GSE68465_GSM1672388	B
GSE68465_GSM1672389	A
GSE68465_GSM1672390	B
GSE68465_GSM1672391	B
GSE68465_GSM1672392	B
GSE68465_GSM1672393	B
GSE68465_GSM1672394	B
GSE68465_GSM1672395	A
GSE68465_GSM1672396	B
GSE68465_GSM1672397	B
GSE68465_GSM1672398	B
GSE68465_GSM1672399	B
GSE68465_GSM1672400	B
GSE68465_GSM1672401	B
GSE68465_GSM1672402	A
GSE68465_GSM1672403	B
GSE68465_GSM1672404	B
GSE68465_GSM1672405	B
GSE68465_GSM1672406	B
GSE68465_GSM1672407	B
GSE68465_GSM1672408	B
GSE68465_GSM1672409	B
GSE68465_GSM1672410	A
GSE68465_GSM1672411	A
GSE68465_GSM1672412	B
GSE68465_GSM1672413	A
GSE68465_GSM1672414	B
GSE68465_GSM1672415	B
GSE68465_GSM1672416	A
GSE68465_GSM1672417	B
GSE68465_GSM1672418	A
GSE68465_GSM1672419	B
GSE68465_GSM1672420	B
GSE68465_GSM1672421	A
GSE68465_GSM1672422	A
GSE68465_GSM1672423	B
GSE68465_GSM1672424	B
GSE68465_GSM1672425	B
GSE68465_GSM1672426	A
GSE68465_GSM1672427	B
GSE68465_GSM1672428	B
GSE68465_GSM1672429	B
GSE68465_GSM1672430	B
GSE68465_GSM1672431	B
GSE68465_GSM1672432	A
GSE68465_GSM1672433	B
GSE68465_GSM1672434	A
GSE68465_GSM1672435	B
GSE68465_GSM1672436	B
GSE68465_GSM1672437	A
GSE68465_GSM1672438	B
GSE68465_GSM1672439	A
GSE68465_GSM1672440	A
GSE68465_GSM1672441	B
GSE68465_GSM1672442	B
GSE68465_GSM1672443	A
GSE68465_GSM1672444	A
GSE68465_GSM1672445	A
GSE68465_GSM1672446	B
GSE68465_GSM1672447	B
GSE68465_GSM1672448	B
GSE68465_GSM1672449	B
GSE68465_GSM1672450	B
GSE68465_GSM1672451	B
GSE68465_GSM1672452	B
GSE68465_GSM1672453	B
GSE68465_GSM1672454	A
GSE68465_GSM1672455	A
GSE68465_GSM1672456	B
GSE68465_GSM1672457	A
GSE68465_GSM1672458	B
GSE68465_GSM1672459	A
GSE68465_GSM1672460	B
GSE68465_GSM1672461	B
GSE68465_GSM1672462	A
GSE68465_GSM1672463	B
GSE68465_GSM1672464	B
GSE68465_GSM1672465	B
GSE68465_GSM1672466	B
GSE68465_GSM1672467	B
GSE68465_GSM1672468	B
GSE68465_GSM1672469	B
GSE68465_GSM1672470	B
GSE68465_GSM1672471	B
GSE68465_GSM1672472	A
GSE68465_GSM1672473	B
GSE68465_GSM1672474	B
GSE68465_GSM1672475	B
GSE68465_GSM1672476	B
GSE68465_GSM1672477	A
GSE68465_GSM1672478	A
GSE68465_GSM1672479	B
GSE68465_GSM1672480	B
GSE68465_GSM1672481	A
GSE68465_GSM1672482	B
GSE68465_GSM1672483	B
GSE68465_GSM1672484	B
GSE68465_GSM1672485	B
GSE68465_GSM1672486	B
GSE68465_GSM1672487	B
GSE68465_GSM1672488	B
GSE68465_GSM1672489	A
GSE68465_GSM1672490	A
GSE68465_GSM1672491	B
GSE68465_GSM1672492	A
GSE68465_GSM1672493	B
GSE68465_GSM1672494	A
GSE68465_GSM1672495	B
GSE68465_GSM1672496	B
GSE68465_GSM1672497	B
GSE68465_GSM1672498	B
GSE68465_GSM1672499	B
GSE68465_GSM1672500	A
GSE68465_GSM1672501	B
GSE68465_GSM1672502	B
GSE68465_GSM1672503	B
GSE68465_GSM1672504	B
GSE68465_GSM1672505	A
GSE68465_GSM1672506	A
GSE68465_GSM1672507	B
GSE68465_GSM1672508	B
GSE68465_GSM1672509	B
GSE68465_GSM1672510	B
GSE68465_GSM1672511	B
GSE68465_GSM1672512	B
GSE68465_GSM1672513	B
GSE68465_GSM1672514	B
GSE68465_GSM1672515	A
GSE68465_GSM1672516	A
GSE68465_GSM1672517	B
GSE68465_GSM1672518	B
GSE68465_GSM1672519	B
GSE68465_GSM1672520	B
GSE68465_GSM1672521	B
GSE68465_GSM1672522	B
GSE68465_GSM1672523	B
GSE68465_GSM1672524	A
GSE68465_GSM1672525	B
GSE68465_GSM1672526	B
GSE68465_GSM1672527	B
GSE68465_GSM1672528	B
GSE68465_GSM1672529	B
GSE68465_GSM1672530	A
GSE68465_GSM1672531	B
GSE68465_GSM1672532	B
GSE68465_GSM1672533	B
GSE68465_GSM1672534	B
GSE68465_GSM1672535	B
GSE68465_GSM1672536	B
GSE68465_GSM1672537	A
GSE68465_GSM1672538	A
GSE68465_GSM1672539	B
GSE68465_GSM1672540	B
GSE68465_GSM1672541	B
GSE68465_GSM1672542	B
GSE68465_GSM1672543	B
GSE68465_GSM1672544	A
GSE68465_GSM1672545	B
GSE68465_GSM1672546	A
GSE68465_GSM1672547	B
GSE68465_GSM1672548	B
GSE68465_GSM1672549	A
GSE68465_GSM1672550	B
GSE68465_GSM1672551	A
GSE68465_GSM1672552	B
GSE68465_GSM1672553	B
GSE68465_GSM1672554	B
GSE68465_GSM1672555	B
GSE68465_GSM1672556	A
GSE68465_GSM1672557	B
GSE68465_GSM1672558	B
GSE68465_GSM1672559	B
GSE68465_GSM1672560	B
GSE68465_GSM1672561	A
GSE68465_GSM1672562	B
GSE68465_GSM1672563	A
GSE68465_GSM1672564	B
GSE68465_GSM1672565	A
GSE68465_GSM1672566	A
GSE68465_GSM1672567	A
GSE68465_GSM1672568	B
GSE68465_GSM1672569	B
GSE68465_GSM1672570	B
GSE68465_GSM1672571	B
GSE68465_GSM1672572	B
GSE68465_GSM1672573	B
GSE68465_GSM1672574	B
GSE68465_GSM1672575	B
GSE68465_GSM1672576	B
GSE68465_GSM1672577	B
GSE68465_GSM1672578	B
GSE68465_GSM1672579	B
GSE68465_GSM1672580	B
GSE68465_GSM1672581	B
GSE68465_GSM1672582	B
GSE68465_GSM1672583	B
GSE68465_GSM1672584	B
GSE68465_GSM1672585	B
GSE68465_GSM1672586	B
GSE68465_GSM1672587	B
GSE68465_GSM1672588	B
GSE68465_GSM1672589	B
GSE68465_GSM1672590	B
GSE68465_GSM1672591	B
GSE68465_GSM1672592	B
GSE68465_GSM1672593	B
GSE68465_GSM1672594	B
GSE68465_GSM1672595	B
GSE68465_GSM1672596	B
GSE68465_GSM1672597	B
GSE68465_GSM1672598	B
GSE68465_GSM1672599	B
GSE68465_GSM1672600	B
GSE68465_GSM1672601	B
GSE68465_GSM1672602	A
GSE68465_GSM1672603	A
GSE68465_GSM1672604	B
GSE68465_GSM1672605	B
GSE68465_GSM1672606	B
GSE68465_GSM1672607	A
GSE68465_GSM1672608	B
GSE68465_GSM1672609	B
GSE68465_GSM1672610	A
GSE68465_GSM1672611	B
GSE68465_GSM1672612	A
GSE68465_GSM1672613	B
GSE68465_GSM1672614	A
GSE68465_GSM1672615	B
GSE68465_GSM1672616	B
GSE68465_GSM1672617	B
GSE68465_GSM1672618	B
GSE68465_GSM1672619	B
GSE68465_GSM1672620	A
GSE68465_GSM1672621	A
GSE68465_GSM1672622	A
GSE68465_GSM1672623	B
GSE68465_GSM1672624	B
GSE68465_GSM1672625	B
GSE68465_GSM1672626	A
GSE68465_GSM1672627	A
GSE68465_GSM1672628	A
GSE68465_GSM1672629	B
GSE68465_GSM1672630	A
GSE68465_GSM1672631	B
GSE68465_GSM1672632	B
GSE68465_GSM1672633	B
GSE68465_GSM1672634	B
GSE68465_GSM1672635	B
GSE68465_GSM1672636	A
GSE68465_GSM1672637	B
GSE68465_GSM1672638	B
GSE68465_GSM1672639	B
GSE68465_GSM1672640	A
GSE68465_GSM1672641	B
GSE68465_GSM1672642	A
GSE68465_GSM1672643	B
GSE68465_GSM1672644	A
GSE68465_GSM1672645	B
GSE68465_GSM1672646	A
GSE68465_GSM1672647	B
GSE68465_GSM1672648	B
GSE68465_GSM1672649	B
GSE68465_GSM1672650	B
GSE68465_GSM1672651	B
GSE68465_GSM1672652	A
GSE68465_GSM1672653	B
GSE68465_GSM1672654	A
GSE68465_GSM1672655	B
GSE68465_GSM1672656	B
GSE68465_GSM1672657	B
GSE68465_GSM1672658	A
GSE68465_GSM1672659	B
GSE68465_GSM1672660	A
GSE68465_GSM1672661	B
GSE68465_GSM1672662	B
GSE68465_GSM1672663	A
GSE68465_GSM1672664	B
GSE68465_GSM1672665	B
GSE68465_GSM1672666	A
GSE68465_GSM1672667	A
GSE68465_GSM1672668	A
GSE68465_GSM1672669	B
GSE68465_GSM1672670	A
GSE68465_GSM1672671	A
GSE68465_GSM1672672	B
GSE68465_GSM1672673	A
GSE68465_GSM1672674	A
GSE68465_GSM1672675	A
GSE68465_GSM1672676	A
GSE68465_GSM1672677	A
GSE68465_GSM1672678	A
GSE68465_GSM1672679	A
GSE68465_GSM1672680	B
GSE68465_GSM1672681	A
GSE68465_GSM1672682	B
GSE68465_GSM1672683	A
GSE68465_GSM1672684	A
GSE68465_GSM1672685	A
GSE68465_GSM1672686	B
GSE68465_GSM1672687	B
GSE68465_GSM1672688	B
GSE68465_GSM1672689	B
GSE68465_GSM1672690	B
GSE68465_GSM1672691	B
GSE68465_GSM1672692	B
GSE68465_GSM1672693	A
GSE68465_GSM1672694	A
GSE68465_GSM1672695	A
GSE68465_GSM1672696	A
GSE68465_GSM1672697	B
GSE68465_GSM1672698	B
GSE68465_GSM1672699	B
GSE68465_GSM1672700	B
GSE68465_GSM1672701	B
GSE68465_GSM1672702	B
GSE68465_GSM1672703	B
GSE68465_GSM1672704	B
GSE68465_GSM1672705	B
GSE68465_GSM1672706	B
GSE68465_GSM1672707	A
GSE68465_GSM1672708	B
GSE68465_GSM1672709	B
GSE68465_GSM1672710	B
GSE68465_GSM1672711	B
GSE68465_GSM1672712	A
GSE68465_GSM1672713	B
GSE68465_GSM1672714	A
GSE68465_GSM1672715	A
GSE68465_GSM1672716	A
GSE68465_GSM1672717	B
GSE68465_GSM1672718	B
GSE68465_GSM1672719	B
GSE68465_GSM1672720	B
GSE68465_GSM1672721	A
GSE68465_GSM1672722	B
GSE68465_GSM1672723	A
GSE68465_GSM1672724	A
GSE68465_GSM1672725	A
GSE68465_GSM1672726	B
GSE68465_GSM1672727	B
GSE68465_GSM1672728	B
GSE68465_GSM1672729	A
GSE68465_GSM1672730	B
GSE68465_GSM1672731	A
GSE68465_GSM1672732	B
GSE68465_GSM1672733	A
GSE68465_GSM1672734	A
GSE68465_GSM1672735	A
GSE68465_GSM1672736	B
GSE68465_GSM1672737	B
GSE68465_GSM1672738	B
GSE68465_GSM1672739	A
GSE68465_GSM1672740	A
GSE68465_GSM1672741	A
GSE68465_GSM1672742	B

## Sheet: Table S3
Table S3. Genes related to pentose phosphate pathway.
GPI
G6PD
PGLS
H6PD
PGD
RPE
RPEL1
TKT
TKTL2
TKTL1
TALDO1
RPIA
DERA
RBKS
PGM1
PGM2
PRPS1L1
PRPS2
PRPS1
RGN
IDNK
GLYCTK
ALDOC
ALDOA
ALDOB
FBP1
FBP2
PFKM
PFKP
PFKL
SHPK

## Sheet: Sheet4
Table S4. Overall survival (OS)-related DPRGs.
id	HR	HR.95L	HR.95H	p-value
MS4A2	0.77376	0.683696	0.875689	4.86e-05
PIK3R1	0.699164	0.601905	0.812139	2.83e-06
ADRB2	0.794238	0.71995	0.876192	4.27e-06
SERPIND1	0.907342	0.864484	0.952326	8.2e-05
CBX7	0.736903	0.650056	0.835354	1.83e-06
FMO3	0.799487	0.725137	0.881461	7.01e-06
RPE	1.38684	1.20589	1.59493	4.55e-06
XRCC5	1.54967	1.2703	1.89047	1.57e-05
DNAJB4	1.32685	1.18836	1.48149	4.95e-07
DSG2	1.25662	1.13993	1.38525	4.35e-06
ORC2	1.39319	1.1793	1.64587	9.64e-05
UBE2K	1.42967	1.19459	1.711	9.62e-05
BCAR3	1.31362	1.18454	1.45676	2.35e-07
STYK1	1.27053	1.1474	1.40688	4.15e-06
MAP4K4	1.3912	1.2097	1.59993	3.67e-06
STK24	1.41448	1.19403	1.67564	6.04e-05
TMOD3	1.25772	1.12322	1.40832	7.08e-05
SEC23A	1.30106	1.15072	1.47104	2.66e-05
GMPR	0.795454	0.719939	0.87889	6.9e-06
MBTPS2	1.41671	1.20495	1.66569	2.48e-05
EIF4E	1.51354	1.23055	1.86162	8.7e-05
CNIH1	1.63808	1.37354	1.95358	3.98e-08
PTBP3	1.46236	1.23875	1.72634	7.17e-06
RTN4	1.62901	1.31084	2.02441	1.08e-05
MYLIP	0.729221	0.645005	0.824432	4.57e-07
DCUN1D1	1.47236	1.22139	1.77491	4.96e-05
ITGB1	1.43643	1.2262	1.6827	7.26e-06
GOLM1	1.24019	1.11961	1.37374	3.71e-05
TMA16	1.44198	1.22005	1.70429	1.77e-05
B4GALT4	1.32019	1.16234	1.49947	1.91e-05
PAK2	1.61621	1.33302	1.95957	1.04e-06
MTMR2	1.3825	1.18069	1.61881	5.75e-05
GBE1	1.32842	1.15186	1.53205	9.51e-05
ACHE	0.841754	0.783353	0.904508	2.66e-06
RAD23B	1.5613	1.28959	1.89025	4.94e-06
ZNF682	0.8573	0.796138	0.92316	4.56e-05
LMAN1	1.26676	1.13609	1.41245	2.07e-05
BZW1	1.66105	1.38996	1.98502	2.38e-08
ABAT	0.774213	0.70058	0.855585	5.2e-07
KCTD3	1.30378	1.16067	1.46455	7.77e-06
GALNT2	1.39931	1.20114	1.63017	1.62e-05
EGLN1	1.46136	1.2597	1.69531	5.52e-07
WDR43	1.39089	1.18054	1.63872	8.02e-05
EHBP1	1.42491	1.23031	1.65029	2.29e-06
STK38L	1.34549	1.1682	1.54967	3.84e-05
NPTN	1.59302	1.31372	1.93169	2.2e-06
STAM	1.62082	1.31671	1.99518	5.24e-06
EIF3J	1.47714	1.23109	1.77238	2.71e-05
GSTM2	0.746086	0.645321	0.862585	7.6e-05
TUBA4A	1.28249	1.13747	1.44599	4.83e-05
INPP5B	0.673474	0.585316	0.77491	3.34e-08
OPN3	1.21404	1.11129	1.32628	1.72e-05
KLK8	1.18258	1.08747	1.28601	8.85e-05
KLK6	1.15179	1.08293	1.22503	7.03e-06
ABCC2	1.12663	1.07588	1.17976	3.96e-07
TRIM16	1.22154	1.10831	1.34634	5.53e-05
ARL14	1.12032	1.06575	1.17768	8.21e-06
KYNU	1.21016	1.13751	1.28744	1.55e-09
HHIPL2	1.13215	1.06777	1.2004	3.24e-05
CENPM	1.25324	1.13663	1.38181	5.9e-06
STRAP	1.52392	1.30449	1.78027	1.09e-07
GGH	1.2009	1.10876	1.30071	6.97e-06
FCGRT	0.743086	0.659853	0.836818	9.62e-07
PVR	1.42349	1.21959	1.66149	7.58e-06
TBC1D31	1.34184	1.1607	1.55126	7.07e-05
RAD54B	1.36355	1.17608	1.58092	3.97e-05
KIF20B	1.29222	1.14884	1.45349	1.94e-05
GTPBP4	1.34214	1.16285	1.54907	5.77e-05
CHEK1	1.37401	1.24585	1.51536	2.02e-10
KIF14	1.32441	1.20304	1.45802	1.01e-08
DAAM2	0.768489	0.694979	0.849774	2.85e-07
TOP2A	1.16773	1.08387	1.25808	4.54e-05
PERP	1.30311	1.16845	1.45328	1.96e-06
ESPL1	1.27744	1.15735	1.40999	1.17e-06
GRAMD1B	1.26141	1.14095	1.39458	5.76e-06
HIP1	0.783591	0.698643	0.878869	3.11e-05
ALDOA	1.38696	1.196	1.6084	1.5e-05
FANCI	1.24492	1.12335	1.37965	2.93e-05
HILPDA	1.2135	1.11503	1.32067	7.4e-06
RGN	0.794134	0.718424	0.877822	6.51e-06
GNG7	0.728417	0.643516	0.824519	5.4e-07
TACC3	1.2569	1.14163	1.3838	3.18e-06
DERA	1.45614	1.25841	1.68494	4.49e-07
BTG2	0.791518	0.717301	0.873414	3.25e-06
WDHD1	1.38947	1.23891	1.55834	1.9e-08
ARNTL2	1.32796	1.22436	1.44032	7.68e-12
MRPS35	1.42966	1.23348	1.65704	2.07e-06
UNG	1.3637	1.17174	1.58712	6.14e-05
PITX1	1.12498	1.06506	1.18828	2.48e-05
CYP2B7P	0.888816	0.850003	0.929401	2.29e-07
DENND1A	1.32553	1.15192	1.52531	8.33e-05
CCT4	1.52189	1.28203	1.80664	1.59e-06
GINS2	1.18419	1.10242	1.27202	3.64e-06
POLR3G	1.34624	1.1715	1.54703	2.77e-05
FOXM1	1.22261	1.13634	1.31542	7.3e-08
MAD2L1	1.28963	1.18364	1.4051	6.13e-09
PBXIP1	0.766495	0.6768	0.868076	2.81e-05
MTHFD2	1.37957	1.22327	1.55584	1.57e-07
AURKA	1.24057	1.13109	1.36065	4.8e-06
POLQ	1.29812	1.14463	1.47219	4.83e-05
NUP62CL	1.23107	1.13371	1.33679	7.6e-07
BIRC5	1.23147	1.12835	1.34402	3.07e-06
TPX2	1.23786	1.14512	1.33812	7.86e-08
RAD51	1.30918	1.1697	1.46529	2.77e-06
CEP55	1.23367	1.13875	1.33649	2.73e-07
BUB1	1.29878	1.17523	1.43533	2.96e-07
XPNPEP1	1.66013	1.34846	2.04383	1.77e-06
SLC2A1	1.28933	1.18571	1.402	2.77e-09
CCT6A	1.34597	1.18308	1.5313	6.35e-06
UBE2S	1.223	1.12002	1.33544	7.27e-06
CENPI	1.27136	1.13619	1.4226	2.84e-05
DTL	1.34882	1.21729	1.49455	1.09e-08
GGTLC1	0.863322	0.81297	0.916792	1.64e-06
LRFN4	1.20383	1.11709	1.2973	1.16e-06
NUP37	1.50157	1.25693	1.79381	7.46e-06
RFC5	1.36772	1.17033	1.59839	8.22e-05
NEIL3	1.26262	1.15846	1.37613	1.1e-07
FKBP4	1.37101	1.20272	1.56285	2.33e-06
PGK1	1.41106	1.22012	1.63188	3.45e-06
NDC1	1.369	1.19775	1.56473	4.1e-06
RAN	1.51075	1.27766	1.78635	1.39e-06
MYBL2	1.15493	1.08258	1.23211	1.28e-05
NPC2	0.794149	0.721621	0.873965	2.39e-06
VDAC1	1.55497	1.30556	1.85203	7.45e-07
PYGL	1.27453	1.15122	1.41105	2.98e-06
COPS8	1.86492	1.4698	2.36627	2.89e-07
STC2	1.29485	1.18011	1.42073	4.8e-08
CKS1B	1.35164	1.20923	1.51083	1.13e-07
P4HA1	1.38204	1.20774	1.5815	2.55e-06
FAAH	0.797435	0.71211	0.892983	8.84e-05
SLC6A8	1.17772	1.08559	1.27767	8.28e-05
HMGA1	1.25655	1.1461	1.37764	1.14e-06
MCM10	1.2027	1.11519	1.29709	1.68e-06
SYNE1	0.784232	0.708175	0.868458	3.02e-06
CTSH	0.802715	0.738988	0.871938	1.92e-07
KCNF1	1.19034	1.09041	1.29944	9.85e-05
PPAT	1.33495	1.1554	1.5424	8.86e-05
HSPD1	1.3836	1.18843	1.61082	2.85e-05
CCNB1	1.26051	1.15171	1.37958	4.98e-07
PLK1	1.31578	1.18786	1.45748	1.45e-07
IL6R	0.801614	0.72235	0.889575	3.15e-05
ST3GAL5	0.822008	0.754007	0.896142	8.63e-06
ATAD2	1.20117	1.09746	1.31467	6.93e-05
RAD51AP1	1.19377	1.09831	1.29753	3.11e-05
CKS2	1.2432	1.12137	1.37827	3.52e-05
DLC1	0.807416	0.73989	0.881105	1.58e-06
CDK1	1.30153	1.18836	1.42548	1.36e-08
SMS	1.45201	1.26838	1.66222	6.44e-08
KIF20A	1.29305	1.16576	1.43424	1.17e-06
FGF12	1.23658	1.11139	1.37588	9.65e-05
GAPDH	1.53652	1.32109	1.78708	2.51e-08
UBA2	1.42984	1.22297	1.67171	7.32e-06
BRCA1	1.30369	1.16036	1.46472	8.08e-06
CTSV	1.21666	1.13307	1.30642	6.66e-08
EXO1	1.34754	1.21716	1.49188	9.18e-09
ARHGAP11A	1.23865	1.1208	1.36889	2.72e-05
OIP5	1.36429	1.21883	1.52711	6.65e-08
SNRPD1	1.39522	1.19785	1.62512	1.87e-05
ADM	1.19253	1.10765	1.28391	2.95e-06
PSMB5	1.44494	1.21002	1.72546	4.79e-05
TMEM38B	1.35031	1.19998	1.51948	6.13e-07
ECT2	1.33084	1.21529	1.45738	6.94e-10
LYPD3	1.18517	1.11892	1.25534	7.09e-09
E2F8	1.2295	1.11198	1.35944	5.56e-05
RPP25	1.31397	1.15974	1.4887	1.82e-05
HMMR	1.37863	1.2455	1.526	5.76e-10
RGS20	1.23357	1.13751	1.33774	3.88e-07
ASPM	1.23626	1.14639	1.33318	3.63e-08
CEP152	1.3512	1.17167	1.55824	3.5e-05
CENPN	1.24154	1.12531	1.36979	1.6e-05
SMC2	1.37351	1.20846	1.56111	1.18e-06
KIF15	1.21984	1.10391	1.34795	9.61e-05
DNAJC9	1.60202	1.34638	1.9062	1.08e-07
TMPRSS2	0.851222	0.797408	0.908668	1.34e-06
DLGAP5	1.25662	1.15886	1.36262	3.24e-08
AVEN	1.37265	1.18531	1.58961	2.33e-05
TPI1	1.4369	1.21328	1.70173	2.67e-05
ZWINT	1.24652	1.13117	1.37362	8.67e-06
BORA	1.38967	1.19014	1.62265	3.17e-05
NCAPG	1.24342	1.13816	1.35842	1.38e-06
TEAD4	1.30878	1.15789	1.47933	1.67e-05
SHCBP1	1.34869	1.21679	1.49489	1.22e-08
SPC25	1.32726	1.19153	1.47846	2.69e-07
DKK1	1.14414	1.09174	1.19906	1.81e-08
NCAPG2	1.30553	1.16615	1.46158	3.69e-06
CRYM	0.877542	0.827651	0.930441	1.22e-05
SLC34A2	0.880817	0.838108	0.925701	5.6e-07
KIFC1	1.15958	1.07852	1.24673	6.21e-05
PRPF4	1.52802	1.25291	1.86355	2.84e-05
DTYMK	1.33514	1.17134	1.52185	1.5e-05
ORC1	1.2212	1.10669	1.34756	6.95e-05
CISH	0.786964	0.707641	0.875178	9.89e-06
SELENBP1	0.860295	0.803454	0.921158	1.6e-05
CENPU	1.30389	1.18113	1.4394	1.44e-07
BUB3	1.54267	1.25931	1.88979	2.83e-05
CDKN3	1.27984	1.16679	1.40385	1.7e-07
PCNA	1.36889	1.2086	1.55044	7.74e-07
RACGAP1	1.34075	1.20685	1.48951	4.7e-08
SCNN1B	0.856843	0.80283	0.91449	3.31e-06
SERPINB5	1.13022	1.08546	1.17682	2.89e-09
CCNA2	1.32372	1.20454	1.45469	5.68e-09
VDAC2	1.5795	1.31959	1.89062	6.26e-07
HSF2BP	1.44301	1.21475	1.71417	2.99e-05
FAM117A	0.516985	0.438941	0.608907	2.76e-15
CCNB2	1.25873	1.15342	1.37366	2.44e-07
MCM6	1.33069	1.18424	1.49524	1.57e-06
CDC6	1.32578	1.20329	1.46074	1.19e-08
DNM1L	1.36474	1.1852	1.57149	1.55e-05
HJURP	1.29236	1.18716	1.40689	3.22e-09
CDCA3	1.19379	1.09747	1.29856	3.68e-05
PFKP	1.30584	1.19647	1.42521	2.24e-09
STX1A	1.2474	1.12688	1.38081	2.01e-05
EIF2S1	1.50785	1.24047	1.83286	3.73e-05
KIF11	1.28821	1.1728	1.41498	1.23e-07
CYCS	1.51105	1.28512	1.7767	5.86e-07
SFTPB	0.893863	0.860527	0.92849	7.2e-09
SLC47A1	0.837881	0.786555	0.892556	4.15e-08
RFTN1	0.783096	0.704088	0.87097	6.61e-06
BUB1B	1.34265	1.2175	1.48066	3.59e-09
B4GALT6	1.22648	1.11229	1.35239	4.23e-05
LRRC61	1.30059	1.1633	1.45408	3.88e-06
DONSON	1.3348	1.1587	1.53766	6.32e-05
NCALD	0.766821	0.681422	0.862923	1.05e-05
TEX30	1.41108	1.20646	1.6504	1.65e-05
PLK4	1.25424	1.13462	1.38646	9.43e-06
HABP2	0.885359	0.832947	0.941068	9.2e-05
ST3GAL4	1.28877	1.14346	1.45254	3.23e-05
GPI	1.45084	1.24804	1.6866	1.27e-06
RRM2	1.30959	1.20204	1.42677	6.88e-10
PKP2	1.23375	1.14591	1.32833	2.49e-08
DAPK2	0.766405	0.680337	0.863362	1.2e-05
KIF18B	1.19903	1.101	1.30579	3.03e-05
GOLT1B	1.40729	1.23194	1.60759	4.85e-07
PGAM1	1.47541	1.24607	1.74695	6.41e-06
KPNA2	1.34906	1.1921	1.52669	2.09e-06
CCT5	1.31092	1.14941	1.49512	5.44e-05
PPFIBP2	0.784478	0.712776	0.863393	6.92e-07
SLC16A1	1.21979	1.12958	1.3172	4.01e-07
TRIP13	1.26031	1.15134	1.37959	5.32e-07
SEMA4A	0.728168	0.635642	0.834161	4.76e-06
FEN1	1.41605	1.23112	1.62876	1.1e-06
LDHA	1.77742	1.49225	2.11709	1.15e-10
PKM	1.55273	1.30724	1.84431	5.41e-07
NKX2-1	0.874539	0.83255	0.918645	9.29e-08
PIGR	0.906251	0.866716	0.947589	1.52e-05
TMPO	1.34034	1.1729	1.53169	1.69e-05
KCMF1	1.90064	1.5126	2.38823	3.55e-08
NR3C2	0.829924	0.75915	0.907295	4.15e-05
PBK	1.23704	1.14429	1.33732	8.84e-08
RHCG	1.18938	1.10449	1.28079	4.42e-06
RNASE1	0.872288	0.816296	0.93212	5.42e-05
CDC45	1.1412	1.07244	1.21437	3.11e-05
SKA1	1.25839	1.14516	1.38281	1.77e-06
KIF2C	1.26499	1.14844	1.39336	1.87e-06
CDT1	1.22962	1.10989	1.36226	7.66e-05
STC1	1.18087	1.0909	1.27826	3.93e-05
ERCC6L	1.22042	1.10942	1.34252	4.24e-05
RFC3	1.32698	1.16006	1.5179	3.71e-05
IVD	0.731375	0.635296	0.841983	1.34e-05
ERLIN1	1.52696	1.28702	1.81163	1.22e-06
GPD1L	0.800012	0.722339	0.886038	1.85e-05
EIF4A3	1.51734	1.28403	1.79304	9.84e-07
AGFG1	1.46924	1.2395	1.74157	9.22e-06
CDC20	1.16258	1.08432	1.2465	2.27e-05
PTPRH	1.2091	1.1212	1.30388	8.19e-07
POLE2	1.26216	1.12863	1.41149	4.49e-05
F12	1.27149	1.14219	1.41543	1.14e-05
DSCC1	1.25636	1.13803	1.38699	6.13e-06
HSD17B6	0.878686	0.826403	0.934276	3.6e-05
ZWILCH	1.32906	1.18196	1.49447	2e-06
SFTPD	0.918642	0.882685	0.956063	3.11e-05
NDC80	1.17557	1.09765	1.25903	3.79e-06
KIF18A	1.26418	1.14592	1.39464	2.89e-06
CMAHP	0.792056	0.721918	0.869008	8.31e-07
CIRBP	0.741366	0.642258	0.855768	4.36e-05
FOSL1	1.17786	1.1105	1.24932	5.1e-08
HLF	0.830418	0.772475	0.892708	4.77e-07
DPYSL2	0.754571	0.681364	0.835644	6.36e-08
MTX2	1.51115	1.22764	1.86014	9.84e-05
NEK2	1.2524	1.15232	1.36117	1.18e-07
PLOD2	1.20884	1.11627	1.30908	3.07e-06
BCAM	0.788839	0.719718	0.864597	3.99e-07
KIF4A	1.2494	1.14443	1.364	6.59e-07
CENPE	1.18791	1.10381	1.27842	4.3e-06
SMOX	1.33418	1.2041	1.4783	3.61e-08
METTL5	1.55526	1.29674	1.86533	1.92e-06
KIF23	1.22073	1.12776	1.32137	8.03e-07
PARPBP	1.27119	1.13148	1.42817	5.36e-05
MCM4	1.27289	1.15393	1.4041	1.43e-06
ELOVL6	1.23281	1.13687	1.33684	4.12e-07
MELK	1.21823	1.12888	1.31465	3.79e-07
CDCA8	1.15592	1.08034	1.23679	2.67e-05
PRC1	1.41014	1.22274	1.62627	2.31e-06
CMAS	1.30655	1.16246	1.4685	7.3e-06
TTK	1.22228	1.12354	1.32969	3e-06
CENPF	1.23438	1.12757	1.35132	5.12e-06
PAICS	1.40473	1.22073	1.61647	2.09e-06
NTSR1	1.27987	1.15319	1.42047	3.48e-06
SNRPA1	1.43373	1.20646	1.70381	4.29e-05
MKI67	1.2747	1.15382	1.40824	1.8e-06
CYP4B1	0.903903	0.868431	0.940825	7.57e-07
CSE1L	1.35678	1.17357	1.5686	3.75e-05

## Sheet: Table S5
Table S5. The coefficients of the risk signature.
id	coefficient
RTN4	0.301978
ACHE	-0.147271
ABAT	-0.128396
EGLN1	0.192381
FAM117A	-0.357764
LRRC61	0.204888
ADM	0.089011
